# Supplementary material for: Nutritional Characteristics and Antimicrobial Activity of Australian Grown Feijoa (Acca sellowiana)
Source: PubMed Central journal article supplement (PMC6770449; doi:10.3390/foods8090376), 2019-09-01
Supplement: foods-08-00376-s001.pdf [file foods-08-00376-s001.pdf]

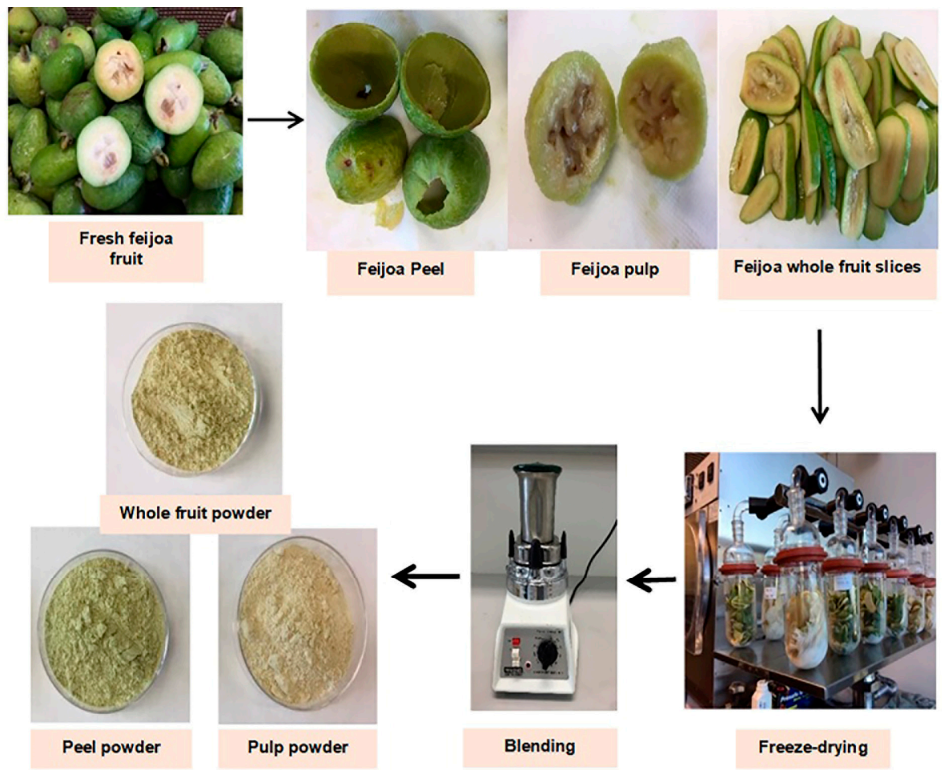

**Supplementary Figure 1:** Feijoa samples: fresh fruit and freeze-dried fruit powder

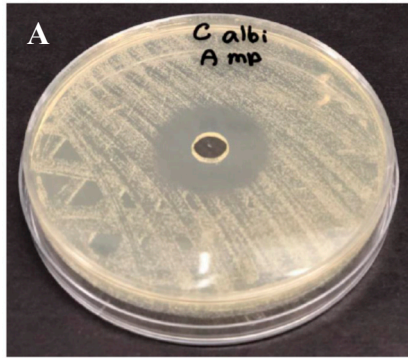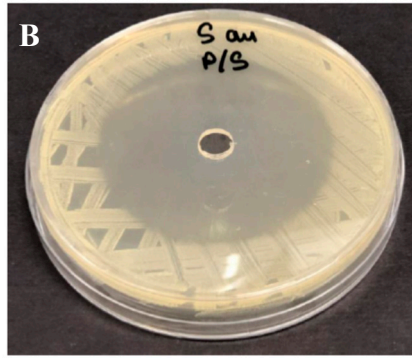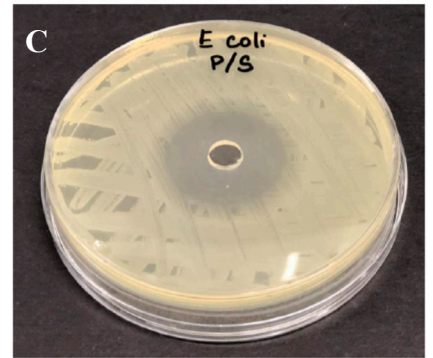

(A, B, C) inhibition of antibiotic controls against *C. albicans*, *S. aureus* and *E. coli*, respectively

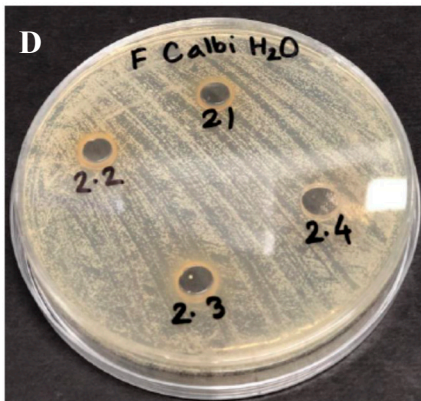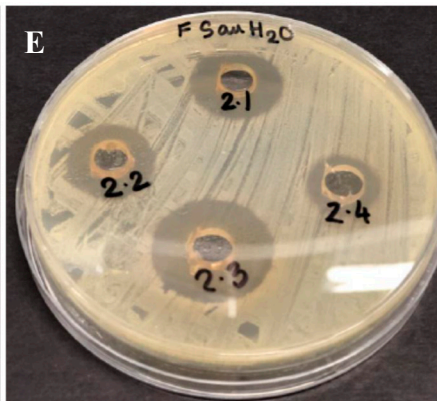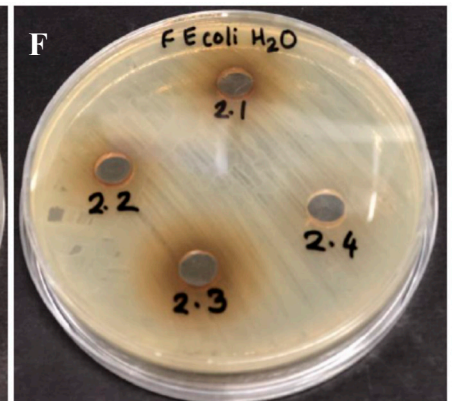

(D, E, F) Inhibition of Feijoa-water extracts against *C. albicans*, *S. aureus* and *E. coli*, respectively

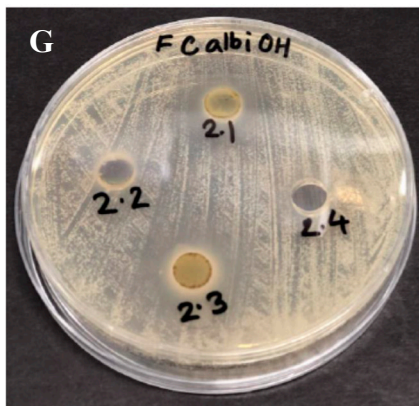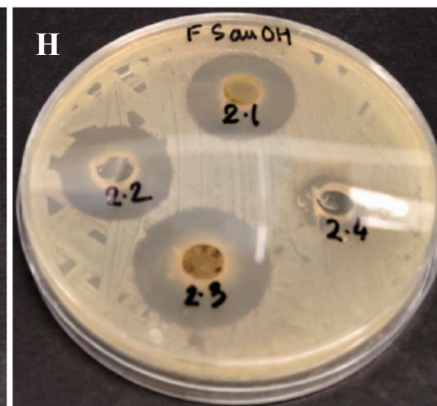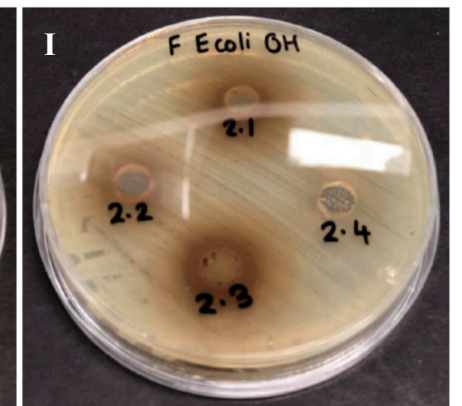

(G, H, I) Inhibition of Feijoa-methanolic extracts against *C. albicans*, *S. aureus* and *E. coli*, respectively

**Supplementary Figure 2:** representative photos showing the inhibitory activity of feijoa extracts (water and methanol) against gram-positive and gram-negative bacteria and yeast. Samples tested included (2.1)–Whole fruit powder, (2.2)–Pulp powder, (2.3)–Skin powder, and (2.4)–Fresh whole fruit puree.
